# Supplementary material
Source: publisher figshare collection journal article supplement (https://acs.figshare.com/ndownloader/files/20160761)
Supplement: Supplementary file 1 [file 20160761]

Figure S1. Disposal and calculation of free and bound AGEs in food.

### Free AGEs detection

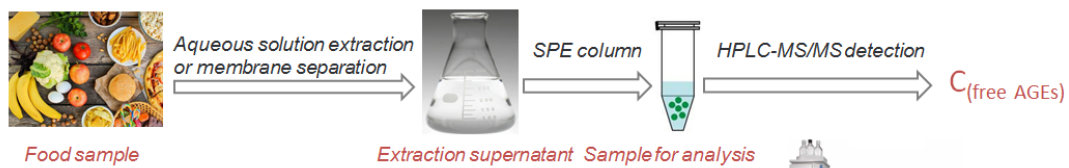

### Total AGEs detection

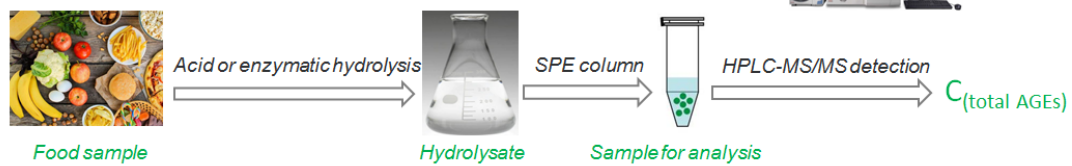

$$C_{(\text{bound AGEs})} = C_{(\text{total AGEs})} - C_{(\text{free AGEs})}$$
